# Supplementary material
Source: PubMed Central journal article supplement (PMC4097577)
Supplement: JB.01596-14_zjb999093220so1.pdf [file JB.01596-14_zjb999093220so1.pdf]

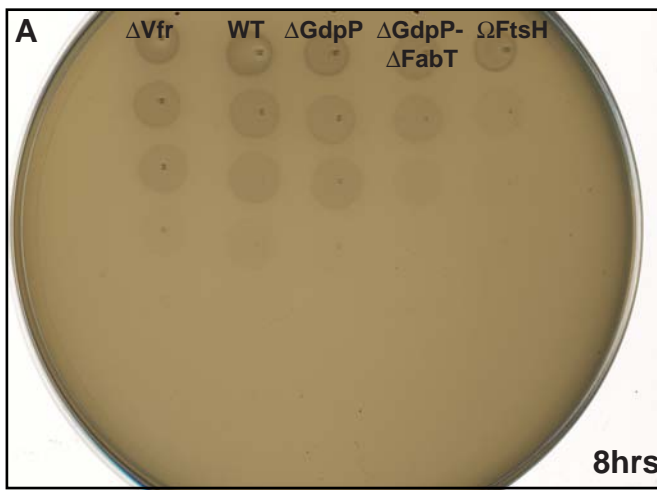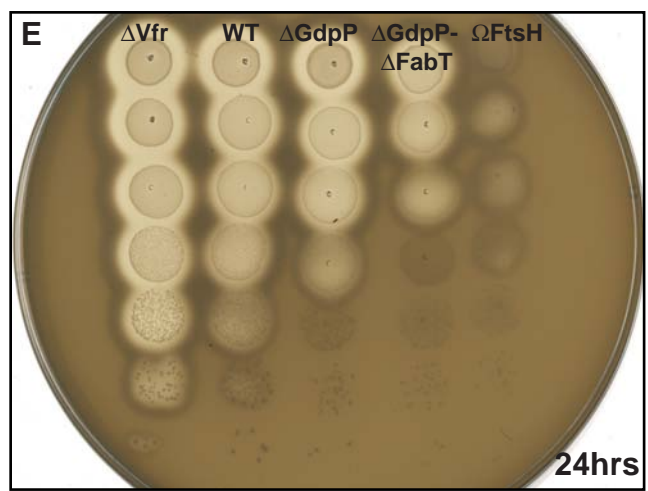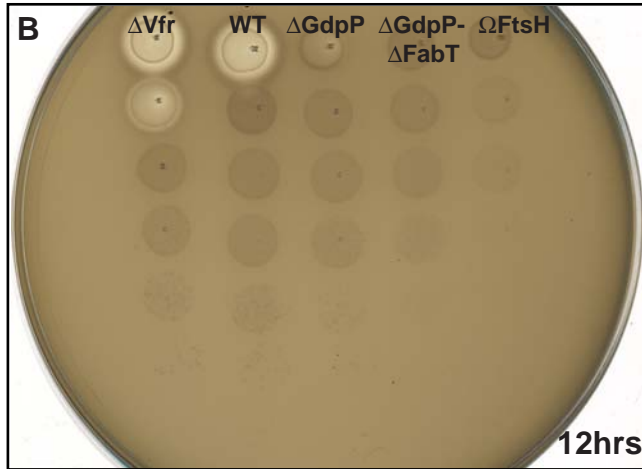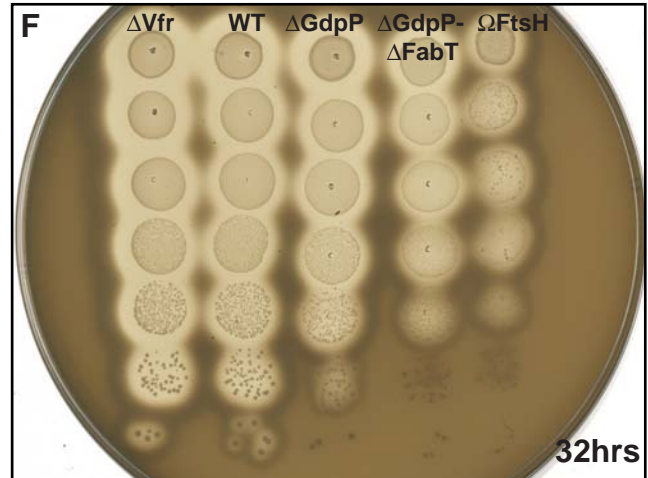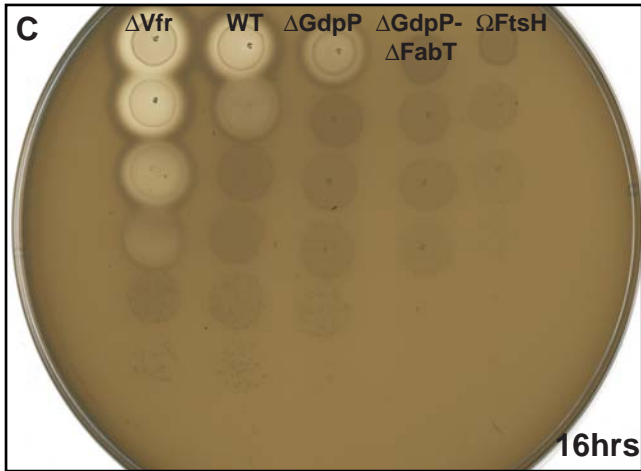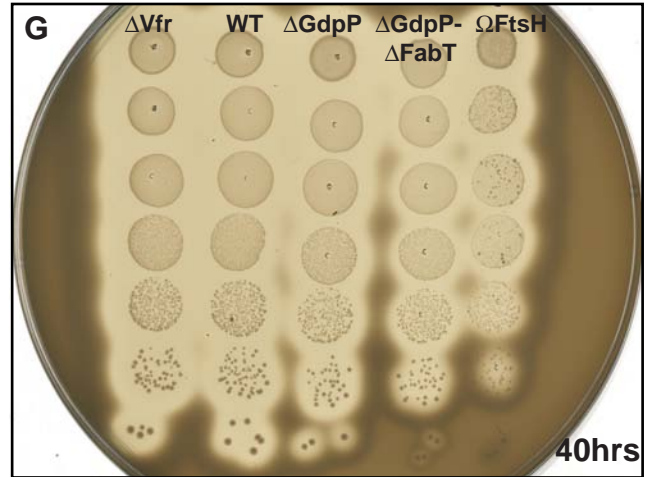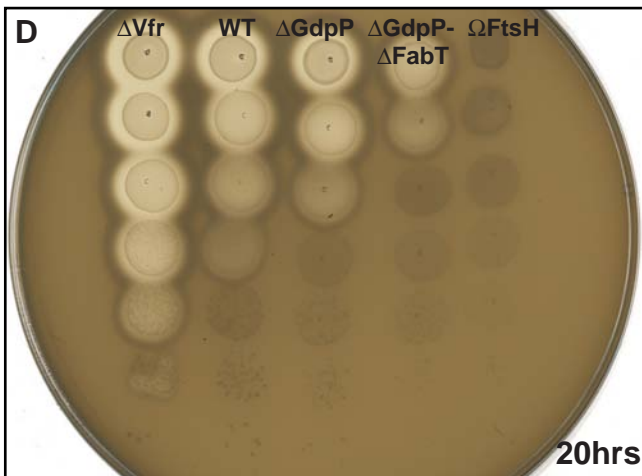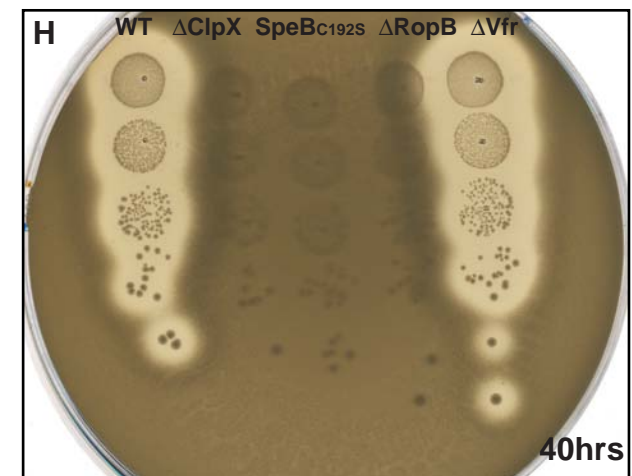

Figure S1

**Figure S1. Use of Protease indicator plates to monitor SpeB expression.** SpeB protease activity was determined for various strains by plating 10-fold serial dilutions onto protease indicator plates and monitoring for protease activity every 4 hours. **(A-G)** A hyperactive SpeB expresser ( $\Delta Vfr$ ) exhibits SpeB activity earlier than wild type (WT) or various PBr mutants including  $\Delta GdpP$ ,  $\Delta GdpP-\Delta FabT$ , and  $\Omega FtsH$ . **(H)** A  $\Delta ClpX$  mutant displays no SpeB activity even upon extended incubation, which is comparable to SpeB-null mutants including the catalytically inactive SpeB<sub>C192S</sub> mutant, or the  $\Delta RopB$  transcriptional activator mutant.

**Table S1. Bacterial strains containing engineered and complemented mutations used in this study**

| Strains (alternate name) | Relevant Genotype     | Mutated Loci <sup>a</sup> | Plasmid(s) <sup>b</sup> | Comment <sup>c</sup>                                     | Reference  |
|--------------------------|-----------------------|---------------------------|-------------------------|----------------------------------------------------------|------------|
| HSC5                     | wild type (WT)        | NA                        |                         |                                                          | (1)        |
| GCP688                   | ΔClpX                 | 03620                     | pGCP666                 |                                                          | This study |
| GCP751                   | ΔGdpP                 | 09125                     | pGCP723                 |                                                          | This study |
| GCP754                   | ΔPstS                 | 04725                     | pGCP733                 |                                                          | This study |
| GCP766                   | ΔGdpP-ΔFabT           | 04725, 07215              | pGCP733; pGCP760        |                                                          | This study |
| GCP767                   | ΔClpX-ΔFabT           | 03620, 07215              | pGCP666; pGCP760        |                                                          | This study |
| GCP771                   | ΔManLMN               | 07135-45                  | pGCP761                 |                                                          | This study |
| GCP784                   | ΔEbsA                 | 03260                     | pGCP774                 |                                                          | This study |
| GCP953                   | ΔPtsI::cat            | 05585                     | pGCP793                 | CamR, allelic replacement of <i>ptsI</i> with <i>cat</i> | This study |
| HSC5-Spc (GCP292)        | ΩControl (ΩCon)       | 09210-15 intergenic       | pSPC18::recF            | SpcR, plasmid insertion downstream of <i>recF</i>        | (2,3)      |
| GCP859                   | ΩHpt                  | 00060                     | pGCP856                 | SpcR, plasmid insertion within <i>hpt</i>                | This study |
| GCP862                   | ΩFtsH                 | 00065                     | pGCP857                 | SpcR, plasmid insertion within <i>ftsH</i>               | This study |
| GCP682                   | ΔVfr                  | 03630                     | pGCP661                 |                                                          | This study |
| JWR100 (GCP057)          | SpeB <sub>C192S</sub> | 08645                     |                         | Enzymatically inactive SpeB                              | (4)        |
| MNN100 (GCP543)          | ΔRopB                 | 08655                     |                         |                                                          | (5)        |
| GCP920                   | ΔGdpP                 | 09125                     | pGdpP                   | KanR, GdpP expressed on multicopy plasmid                | This study |
| GCP1230                  | ΔGdpP-ΔFabT           | 04725, 07215              | pGdpP                   | KanR, GdpP expressed on multicopy plasmid                | This study |
| GCP695                   | ΔClpX                 | 03620                     | pClpX                   | KanR, ClpX expressed on multicopy plasmid                | This study |
| GCP1232                  | ΔClpX-ΔFabT           | 03620, 07215              | pClpX                   | KanR, ClpX expressed on multicopy plasmid                | This study |

<sup>a</sup>Loci are based on the genome of HSC5 (1) and follow the format L897\_XXXXX, where XXXXX is the number listed in the Table. NA, not applicable.

<sup>b</sup>Mutagenic plasmid (Table S3) used to delete, disrupt or alter or endogenous gene(s) in HSC5. Complementation plasmid (pGdpP or pClpX, Table S3) used to restore expression of select genes in deletion mutants. See the Experimental Procedures for details.

<sup>c</sup>Antibiotics are abbreviated as follows: chloramphenicol (Cam), spectinomycin (Spc), kanamycin (Kan).

#### REFERENCES

1. Port GC, Paluscio E, Caparon MG (2013) Complete Genome Sequence of emm Type 14 *Streptococcus pyogenes* Strain HSC5. *Genome Announc* 1: 612-613.
2. Cho KH, Caparon MG (2005) Patterns of virulence gene expression differ between biofilm and tissue communities of *Streptococcus pyogenes*. *Mol Microbiol* 57: 1545-1556.
3. Cho KH, Caparon MG (2008) tRNA modification by GidA/MnmE is necessary for *Streptococcus pyogenes* virulence: a new strategy to make live attenuated strains. *Infect Immun* 76: 3176-3186.
4. Loughman JA, Caparon M (2006) Regulation of SpeB in *Streptococcus pyogenes* by pH and NaCl: a model for in vivo gene expression. *J Bacteriol* 188: 399-408.
5. Neely MN, Lyon WR, Runft DL, Caparon M (2003) Role of RopB in growth phase expression of the SpeB cysteine protease of *Streptococcus pyogenes*. *J Bacteriol* 185: 5166-74.

Table S2. Auxotrophic P<sub>i</sub> revertant mutants isolated in this study

| Revertant Strain | Parental Strain | Gene        | Parental              |                                | Auxotrophic P <sub>i</sub> Revertant |                              | Consequence versus wild type (WT)                                                  |
|------------------|-----------------|-------------|-----------------------|--------------------------------|--------------------------------------|------------------------------|------------------------------------------------------------------------------------|
|                  |                 |             | Mutation <sup>a</sup> | Consequence                    | Mutation                             | Codon (Alteration)           |                                                                                    |
| GCP1091          | PBr1.1          | <i>pstS</i> | A -> -                | Frame Shift: aa6               | - -> A                               | X6K (X:AAx @ 6 -> K:AA)      | Restore WT <i>pstS</i> allele                                                      |
| GCP1092          | PBr2.1          | <i>pstS</i> | A -> -                | Frame Shift: aa6               | - -> A                               | X6K (X:AAx @ 6 -> K:AA)      | Restore WT <i>pstS</i> allele                                                      |
| GCP1093          | PBr3.1          | <i>pstS</i> | A -> -                | Frame Shift: aa6               | - -> A                               | X6K (X:AAx @ 6 -> K:AA)      | Restore WT <i>pstS</i> allele                                                      |
| GCP1094          | PBr3.3          | <i>pstS</i> | A -> -                | Frame Shift: aa6               | - -> A                               | X6K (X:AAx @ 6 -> K:AA)      | Restore WT <i>pstS</i> allele                                                      |
| GCP1095          | PBr3.7          | <i>pstS</i> | A -> -                | Frame Shift: aa6               | - -> A                               | X6K (X:AAx @ 6 -> K:AA)      | Restore WT <i>pstS</i> allele                                                      |
| GCP1096          | PBr4.4          | <i>pstS</i> | A -> -                | Frame Shift: aa6               | - -> A                               | X6K (X:AAx @ 6 -> K:AA)      | Restore WT <i>pstS</i> allele                                                      |
| GCP1097          | PBr4.5          | <i>pstS</i> | A -> -                | Frame Shift: aa6               | - -> A                               | X6K (X:AAx @ 6 -> K:AA)      | Restore WT <i>pstS</i> allele                                                      |
| GCP1098          | PBr10.14        | <i>pstS</i> | A -> -                | Frame Shift: aa6               | - -> A                               | X6K (X:AAx @ 6 -> K:AA)      | Restore WT <i>pstS</i> allele                                                      |
| GCP1100          | PBr10.9         | <i>pstA</i> | 19bp -> -             | Frame Shift: aa35              | - -> C                               | X35R (X:xGC @ 35 -> R:cGC)   | Restore <i>pstA</i> open reading frame: 18bp in frame deletion ( $\Delta$ G36-41S) |
| GCP1104          | PBr3.2          | <i>pstC</i> | C -> T                | Premature Stop<br>Codon: Q126* | G -> T                               | *126Y (*:TAG @ 126 -> Y:TAt) | Restore <i>pstC</i> open reading frame: missense mutation (Q126Y)                  |

<sup>a</sup>PBr 10.9 19bp deletion is described in Table S4. - indicates absence of nucleotide (deletion).

**Table S3. Plasmids used in this study**

| Plasmid (resistance) <sup>a</sup> | Features                                                                               | Reference  |
|-----------------------------------|----------------------------------------------------------------------------------------|------------|
| pABG5 (Kan, Cam)                  | Expression vector containing <i>rofA</i> promoter, source of <i>cat</i>                | (1)        |
| pJRS233 (Erm)                     | Low-copy temperature-sensitive shuttle vector used for allelic replacement             | (2)        |
| pGCP213 (Erm)                     | High-copy temperature-sensitive shuttle vector used for allelic replacement            | (3)        |
| pSPC18 (Spc)                      | Integrational vector                                                                   | (4)        |
| pGCP666 (Erm)                     | pGCP213:: $\Delta$ <i>clpX</i> , allelic replacement plasmid                           | This study |
| pGCP723 (Erm)                     | pGCP213:: $\Delta$ <i>gdpP</i> , allelic replacement plasmid                           | This study |
| pGCP733 (Erm)                     | pJRS233:: $\Delta$ <i>pstS</i> , allelic replacement plasmid                           | This study |
| pGCP760 (Erm)                     | pJRS233:: $\Delta$ <i>fabT</i> , allelic replacement plasmid                           | This study |
| pGCP761 (Erm)                     | pGCP213:: $\Delta$ <i>manLMN</i> , allelic replacement plasmid                         | This study |
| pGCP774 (Erm)                     | pGCP213:: $\Delta$ <i>ebaA</i> , allelic replacement plasmid                           | This study |
| pGCP775 (Erm)                     | pGCP213:: $\Delta$ <i>pstI</i> , allelic replacement plasmid, used to generate pGCP793 | This study |
| pGCP793 (Erm, Cam)                | pGCP213:: $\Delta$ <i>pstI</i> :: <i>cat</i> , allelic replacement plasmid             | This study |
| pGCP856 (Spc)                     | pSPC18:: $\Omega$ <i>hpt</i> , insertional disruption plasmid                          | This study |
| pGCP857 (Spc)                     | pSPC18:: $\Omega$ <i>ftsH</i> , insertional disruption plasmid                         | This study |
| pGCP661 (Erm)                     | pGCP213:: $\Delta$ <i>vfr</i> , allelic replacement plasmid                            | This study |
| pGdpP (Kan, Cam)                  | pABG5::GdpP, expression vector                                                         | (5)        |
| pClpX (Kan, Cam)                  | pABG5::ClpX, expression vector                                                         | This study |

<sup>a</sup>Antibiotics are abbreviated as follows: kanamycin (Kan), chloramphenicol (Cam), spectinomycin (Spc), erythromycin (Erm).

## REFERENCES

- Granok AB, Parsonage D, Ross RP, Caparon MG (2000) The RofA binding site in *Streptococcus pyogenes* is utilized in multiple transcriptional pathways. *J Bacteriol* 182: 1529-40.
- Perez-Casal J, Price JA, Maguin E, Scott JR (1993) An M protein with a single C repeat prevents phagocytosis of *Streptococcus pyogenes*: use of a temperature-sensitive shuttle vector to deliver homologous sequences to the chromosome of *S. pyogenes*. *Mol Microbiol* 8: 809-19.
- Nielsen HV, Guiton PS, Kline KA, Port GC, Pinkner JS, et al. (2010) The metal ion-dependent adhesion site motif of the *Enterococcus faecalis* EbpA pilin mediates pilus function in catheter-associated urinary tract infection. *mBio* 3: e00177-00112.
- Cho KH, Caparon MG (2005) Patterns of virulence gene expression differ between biofilm and tissue communities of *Streptococcus pyogenes*. *Mol Microbiol* 57: 1545-1556.
- Cho KH, Kang SO (2013) *Streptococcus pyogenes* c-di-AMP phosphodiesterase, GdpP, influences SpeB processing and virulence. *PLoS One* 8: e69425

**Table S4. Mutagenesis and complementation primers used in this study**

| Name (description) <sup>a</sup>  | Sequence <sup>b</sup>                                        | Template | Plasmid <sup>c</sup> |
|----------------------------------|--------------------------------------------------------------|----------|----------------------|
| GP712 ( $\Delta$ ClpX-M13F-F1)   | tgtaaaacgacggccagt-GAGGTGTTGACAATGACTAGTATTG                 | HSC5     | pGCP666              |
| GP713 ( $\Delta$ ClpX-R2)        | GTTTTGACTTGCTTCGAC-CTGGCTTTTACCACAAAATG                      |          |                      |
| GP714 ( $\Delta$ ClpX-F3)        | CATTTTGTGGTAAAAGCCAG-GTCGAAGGCAAGTCAAAAC                     |          |                      |
| GP715 ( $\Delta$ ClpX-M13R-R4)   | cacacaggaacagctatgac-ACCTATCGCTAGACCTGCTC                    |          |                      |
| GP822 ( $\Delta$ GdpP-M13F-F1)   | tgtaaaacgacggccagt-AAATATTGATTGGGATGCTATTG                   | HSC5     | pGCP723              |
| GP823 ( $\Delta$ GdpP-R2)        | CAATAATAAGTGCTTCGCTTG-CATCATAATCAAATGAATGGTTTC               |          |                      |
| GP824 ( $\Delta$ GdpP-F3)        | GAAACCATTTCATTGATTATGATG-CAAGCGAAGCACTTATTATTG               |          |                      |
| GP825 ( $\Delta$ GdpP-M13R-R4)   | cacacaggaacagctatgac-CACGTGTTTTGTCCTCATC                     |          |                      |
| GP807 ( $\Delta$ PstS-M13F-F1)   | tgtaaaacgacggccagt-CAACAGGCTGGTACCAATTAC                     | HSC5     | pGCP733              |
| GP808 ( $\Delta$ PstS-R2)        | CTTTTTGTACTTTTCCATCATG-GAAAGTTGATAGGACCAAAAGAC               |          |                      |
| GP809 ( $\Delta$ PstS-F3)        | GTCTTTTGGTCTATCAACTTTC-CATGATGGAAAAGTAACAAAAG                |          |                      |
| GP810 ( $\Delta$ PstS-M13R-R4)   | cacacaggaacagctatgac-CAAAAAGGATCCTGTAATCATTG                 |          |                      |
| GP828 ( $\Delta$ FabT-M13R-F1)   | cacacaggaacagctatgac-CTCTTCAAATTTCTTATGCTGG                  | HSC5     | pGCP760              |
| GP802 ( $\Delta$ FabT-R2)        | CCAAAAATTGATGTAGATTCCC-CAAAATCCGGTTGAAAATATC                 |          |                      |
| GP803 ( $\Delta$ FabT-F3)        | GATATTTTCAACCGGATTTTG-GGGAATCTACATCAATTTTTTG                 |          |                      |
| GP829 ( $\Delta$ FabT-M13R-R4)   | tgtaaaacgacggccagt-GCAATAGCTGCTTGAACTTTC                     |          |                      |
| GP846 ( $\Delta$ ManLMN-M13F-F1) | tgtaaaacgacggccagt-GGTGGTTTTTCTTCTGTCAAC                     | HSC5     | pGCP761              |
| GP847 ( $\Delta$ ManLMN-R2)      | CAAGGTGAGCAAGGATACC-GCTGGCAATAATAATACCGATAC                  |          |                      |
| GP848 ( $\Delta$ ManLMN-F3)      | GTATCGGTATTATTATTGCCAGC-GGTATCCTTGCTCACCTTG                  |          |                      |
| GP849 ( $\Delta$ ManLMN-M13R-R4) | cacacaggaacagctatgac-CTGTCCAAGGAATTTGAATATAATC               |          |                      |
| GP865 ( $\Delta$ EbsA-M13F-F1)   | tgtaaaacgacggccagt-AAGAAGTAATGGAAGAGCTTGC                    | HSC5     | pGCP774              |
| GP866 ( $\Delta$ EbsA-R2)        | GGCTTTTTTATCATGCTGATAAAC-CTGCCAGTGATACCTTATTTTACC            |          |                      |
| GP867 ( $\Delta$ EbsA-F3)        | GGTAAAATAAGGTATCACTGGCAG-GTTTATCAGCATGATAAAAAGCC             |          |                      |
| GP868 ( $\Delta$ EbsA-M13R-R4)   | cacacaggaacagctatgac-CGTGTTCTGTCCCTATAGTATC                  |          |                      |
| GP871 ( $\Delta$ PtsI-M13F-F1)   | tgtaaaacgacggccagt-GCTTCAAAGACTTTCACATTG                     | HSC5     | pGCP775              |
| GP872 ( $\Delta$ PtsI-R2)        | CTTCTTCTGCTGTTGAACATTC-GGCTGCAATTCCTTTAAGC                   |          |                      |
| GP873 ( $\Delta$ PtsI-F3)        | GCTTAAAGGAATTGCAGCC-GAATGTTCAACAGCAGAAGAAG                   |          |                      |
| GP874 ( $\Delta$ PtsI-M13R-R4)   | cacacaggaacagctatgac-GATAGTTTCCATTACCGTTC                    |          |                      |
| GP886 ( $\Delta$ PtsI::cat-F1)   | CTAAAGAGGGATTGGCATAAGACT-ATGAACTTTAATAAAAATTGATTTAGACAATTG   | pABG5    | pGCP793              |
| GP887 ( $\Delta$ PtsI::cat-R2)   | GTTTAAACCAACTCTTTAACC CG- <i>TTATAAAAGCCAGTCATTAGGCCTATC</i> |          |                      |
| GP966 ( $\Omega$ Hpt-M13F-F1)    | tgtaaaacgacggccagt-GCTTATGATTGGTGTATTTAAAGG                  | HSC5     | pGCP856              |
| GP967 ( $\Omega$ Hpt-M13R-R1)    | cacacaggaacagctatgac-CAGGTTTATCAAACAGTGTTGC                  |          |                      |
| GP968 ( $\Omega$ FtsH-M13F-F1)   | tgtaaaacgacggccagt-CATCTTAAGGCTGGAGATATAAAAATC               | HSC5     | pGCP857              |
| GP969 ( $\Omega$ FtsH-M13R-R1)   | cacacaggaacagctatgac-CATCATCATCATGAAAGCAG                    |          |                      |
| GP690 ( $\Delta$ Vfr-M13F-F1)    | tgtaaaacgacggccagt-GGGAAAGATGATCGAAGAATAC                    | HSC5     | pGCP661              |
| GP691 ( $\Delta$ Vfr-R2)         | GACGGACTTTTTTTTAGCGC-CAATGACTTTCCTTTAGAGCG                   |          |                      |
| GP692 ( $\Delta$ Vfr-F3)         | CGCTCTAAAGGAAAGTCATTG-GCGCTAAAAAAAAGTCCGTC                   |          |                      |
| GP693 ( $\Delta$ Vfr-M13R-R4)    | cacacaggaacagctatgac-CGTTATTATTGCTACATCAAATGC                |          |                      |
| ZC341 (pClpX-F-EcoRI)            | AACT- <u>GAATTC</u> -GTAAGAGAATTATAAGAAATGGC                 | HSC5     | pClpX                |
| ZC343 (pClpX-R-PstI)             | AATGAT- <u>CTGCAG</u> -TTAAGCTGTCTCTAAAACGGG                 |          |                      |

<sup>a</sup>Primers are categorized as forward (F) or reverse (R) relative to the direction of transcript.

<sup>b</sup>Sequence is shown 5' to 3'. Uppercase sequence anneals to the HSC5 chromosome, uppercase italics sequence anneals to the *cat* gene, lowercase sequence anneals to the M13F and M13R universal primer sequences. Hyphens indicate junctions between contiguous DNA regions, underline indicates restriction sites.

<sup>c</sup>Plasmid that was constructed using the indicated primers.

**Table S5. Real-time RT-PCR primers used in this study**

| Name (description) <sup>a</sup> | Sequence                   |
|---------------------------------|----------------------------|
| GP1021 ( <i>recA</i> -F)        | AGTGATGCGATTAGGAGAACG      |
| GP1022 ( <i>recA</i> -R)        | TCGTTTTACCGGAAGACTCTG      |
| GP1023 ( <i>speB</i> -F)        | CCAAGGTGTCGGTAAAGTAGG      |
| GP1024 ( <i>speB</i> -R)        | AGAGCTGAAGGGTTTAGTGC       |
| GP1027 ( <i>fabM</i> -F)        | TGACAGGTGAAGGAATTACTGC     |
| GP1028 ( <i>fabM</i> -R)        | CCAGCATAAGAATTTGAAGAGCC    |
| GP1029 ( <i>fabH</i> -F)        | ACGGAATGGTAATAGGTGCAG      |
| GP1030 ( <i>fabH</i> -R)        | CACCAGCTCCATCTCCAAAA       |
| GP1031 ( <i>fabK</i> -F)        | AAGAAATGGGAGCAGGATCG       |
| GP1032 ( <i>fabK</i> -R)        | CTCACAAGCCCTGCAATTTG       |
| GP1033 ( <i>pgsA</i> -F)        | GCGTAAGTGGCATGTAGTCAG      |
| GP1034 ( <i>pgsA</i> -R)        | AGGCACTCATGACAAGCATC       |
| GP1035 ( <i>cls</i> -F)         | ACCTATTACAATTATCGAGATCACCG |
| GP1036 ( <i>cls</i> -R)         | CCTCAAGCATTAAACCAGCATC     |
| GP1039 ( <i>fabT</i> -F)        | AGACGAGTCAGTTTAGTGATGTC    |
| GP1040 ( <i>fabT</i> -R)        | GCTAGTGGTTACTGTCCCTAAC     |

<sup>a</sup>Primers are categorized as forward (F) or reverse (R) relative to the direction of transcript.

**Table S7. Transitions and Transversions of SNPs**

| Type<br>(Total) <sup>a</sup> | Event     | Number |
|------------------------------|-----------|--------|
| Transitions (17)             | C:G → T:A | 16     |
|                              | A:T → C:G | 1      |
| Transversions (14)           | A:T → T:A | 5      |
|                              | A:T → C:G | 0      |
|                              | C:G → A:T | 9      |
|                              | C:G → G:C | 0      |

<sup>a</sup>Analysis of 31 total SNPs distributed among 25 PB-resistant mutants.



**Table S8. Number of Deleted or Inserted Nucleotides in InDels.**

| Events<br>(Total) <sup>a</sup> | Number of Altered Nucleotides <sup>b</sup> |   |    |    |    |     |
|--------------------------------|--------------------------------------------|---|----|----|----|-----|
|                                | 1                                          | 3 | 12 | 15 | 19 | 167 |
| Deletions (21)                 | 15                                         | 1 | 1  | 2  | 1  | 1   |
| Insertions (3)                 | 3                                          | - | -  | -  | -  | -   |

<sup>a</sup>Analysis of 24 total InDels distributed among 25 PB-resistant mutants.

<sup>b</sup>Inverse background and font indicates an in-frame InDel (multiple of 3 nucleotides). - indicates a mutation that was not observed.

**Table S9. Deletions or Insertions of Repetitive Elements.**

| Type<br>(Total) <sup>a</sup> | Event                                      | Gene(s)                          | Number |
|------------------------------|--------------------------------------------|----------------------------------|--------|
| Deletions (19)               | 9xA → 8xA                                  | <i>pstS</i> (8), <i>yfmH</i> (1) | 9      |
|                              | 8xA → 7xA                                  | <i>topA</i> , 07750              | 2      |
|                              | 7xA → 6xA                                  | <i>gdpP</i>                      | 1      |
|                              | 6xA → 5xA                                  | <i>gdpP</i>                      | 1      |
|                              | 3xC → 2xC                                  | <i>topA</i>                      | 1      |
|                              | 2xC → 1xC                                  | <i>gdpP</i>                      | 1      |
|                              | 3x(CGT) → 2x(CGT)                          | <i>ftsH</i>                      | 1      |
|                              | 3x(ATT) <sup>b</sup> → 1x(ATT)             | <i>gdpP</i>                      | 1      |
|                              | 4x(ATT) <sup>c</sup> → 1x(ATT)             | <i>epsA</i>                      | 1      |
|                              | 2x(AAGCCATTG) <sup>d</sup> → 1x(AAGCCATTG) | <i>clpX</i>                      | 1      |
| Insertions (3)               | 6xA → 7xA                                  | <i>gdpP</i>                      | 1      |
|                              | 4xC → 5xC                                  | <i>hpt</i>                       | 1      |
|                              | 2xC → 3xC                                  | <i>clpX</i>                      | 1      |

<sup>a</sup> Analysis of 24 total InDels distributed among 25 PB-resistant mutants.

<sup>b</sup> PBr 4.4 contains a 12 nucleotide deletion within *gdpP* including loss of a complete and partial copy of the 3-nucleotide repetitive element ATT separated by 7-nucleotides, GAAAAC.

<sup>c</sup> PBr 11.1 contains a 15 nucleotide deletion within *epsA* including loss of three copies of the 3-nucleotide repetitive element ATT separated by 1-nucleotide, T and 5-nucleotides, GGCT.

<sup>d</sup> PBr 9.21 contains a 15 nucleotide deletion within *clpX* including loss of one copy of the 9-nucleotide repetitive element AAGCCATTG separated by 6-nucleotides, CCAATA.

**Table S10. Distribution of Mutation Type in PBr Isolates.**

| Class           | Gene<br>(Frequency)             | Premature Termination |          | Codon Altering/Loss |                   | RBS | Other (type)        |
|-----------------|---------------------------------|-----------------------|----------|---------------------|-------------------|-----|---------------------|
|                 |                                 | Frame-shift           | Nonsense | Missense            | In-frame Deletion |     |                     |
| Core            | <i>pstSCA</i> <sup>a</sup> (10) | 9                     | 1        |                     |                   |     |                     |
|                 | <i>gdpP</i> (7)                 | 4                     | 1        | 1                   | 1                 |     |                     |
|                 | <i>fabT</i> <sup>b</sup> (6)    |                       |          | 4                   |                   | 1   | 1 (stop codon lost) |
|                 | <i>clpX</i> (4)                 | 1                     | 2        |                     | 1                 |     |                     |
|                 | <i>hpt</i> <sup>c</sup> (4)     | 1                     |          |                     |                   | 3   |                     |
|                 | <i>manLN</i> <sup>b,d</sup> (4) |                       |          | 4                   |                   |     |                     |
|                 | <i>topA</i> (4)                 | 2                     | 1        | 1                   |                   |     |                     |
|                 | <i>ptsI</i> (2)                 |                       |          | 2                   |                   |     |                     |
|                 | <i>ebsA</i> (2)                 |                       |          | 1                   | 1                 |     |                     |
|                 | <i>ftsH</i> (2)                 |                       |          | 1                   | 1                 |     |                     |
|                 | Guanine <sup>e</sup>            | <i>deoB</i> (1)       |          |                     | 1                 |     |                     |
| <i>gmk</i> (1)  |                                 |                       |          | 1                   |                   |     |                     |
| <i>guaA</i> (1) |                                 |                       |          | 1                   |                   |     |                     |
| <i>nupP</i> (1) |                                 |                       | 1        |                     |                   |     |                     |
| Other           | <i>yfmH</i> (1)                 | 1                     |          |                     |                   |     |                     |
|                 | <i>agaS</i> (1)                 |                       |          | 1                   |                   |     |                     |
|                 | <i>L897_07750</i> (1)           |                       |          |                     |                   |     | 1 (intergenic)      |
|                 | <i>nanH</i> (1)                 |                       |          |                     |                   |     | 1 (synonymous SNP)  |
|                 | <i>luxR</i> (1)                 |                       |          | 1                   |                   |     |                     |
|                 | <i>fba</i> (1)                  |                       |          | 1                   |                   |     |                     |
| Total (55)      |                                 | 18                    | 5        | 21                  | 4                 | 4   | 3                   |

<sup>a</sup>All *pstS* mutations (8/8) are identical, but were recovered in independent experiments or with different companion mutations. Mutations in *pstC* and *A* are included with *pstS*, as they are in the same putative operon and metabolic pathway.

<sup>b</sup>A *fabT* mutation (S84L) and a *manL* mutation (N284K) were recovered twice, but in independent experiments and with different companion mutations.

<sup>c</sup>Mutation of the *hpt* RBS also affects *tilS*, as the RBS overlaps the 3' end of *tilS*.

<sup>d</sup>Grouped together as part of the same putative operon and metabolic pathway.

<sup>e</sup>Genes involved in metabolism of guanine, exclusive of *hpt*.

**Table S11. Distribution of Core PBr Gene Mutations Isolated from Independent Experiments.**

| Gene                       | Experiment <sup>a</sup> |   |   |   |   |   |    |    |  |
|----------------------------|-------------------------|---|---|---|---|---|----|----|--|
|                            | 1                       | 2 | 3 | 4 | 6 | 9 | 10 | 11 |  |
| <i>pstSCA</i> <sup>b</sup> | X                       | X | X | X |   |   | X  |    |  |
| <i>gdpP</i>                |                         |   | X |   |   |   | X  |    |  |
| <i>fabT</i>                |                         |   | X |   |   | X | X  | X  |  |
| <i>clpX</i>                |                         |   |   | X |   | X | X  | X  |  |
| <i>hpt</i> <sup>c</sup>    |                         |   |   |   | X |   | X  | X  |  |
| <i>manLN</i> <sup>b</sup>  |                         |   |   |   | X |   |    | X  |  |
| <i>topA</i>                |                         |   | X |   |   |   | X  | X  |  |
| <i>ptsI</i>                |                         |   |   |   |   |   |    | X  |  |
| <i>ebsA</i>                |                         |   | X |   |   |   |    | X  |  |
| <i>ftsH</i>                |                         |   | X |   |   |   |    |    |  |
| Guanine <sup>d</sup>       |                         |   |   | X |   |   | X  | X  |  |

<sup>a</sup> Mutations in spontaneous PB-resistant isolates selected from independent cultures.

The individual experiments listed were conducted on different days. No PB-resistant colonies were isolated in experiments 5, 7 and 8. The “X” indicates isolation of 1 or more mutants altered in the indicated gene in that experiment.

<sup>b</sup> Genes from the same putative operon and metabolic pathway grouped together.

<sup>c</sup> Due to overlap, mutation of the *hpt* RBS also affects the 3’ end of *tilS*.

<sup>d</sup> Genes other than *hpt* predicted to be involved in guanine metabolism, including *guaA*, *deoB*, *gmk* and *nupP* (*yufP*).

**Table S12. Genomic Analysis of *S. pyogenes* HSC5 Sugar Transporters.**

| Type                 | Sugar              | Gene(s) <sup>a</sup>                | Transport Protein(s)             | Loci <sup>b</sup>                | Comments/Reference <sup>c</sup> |
|----------------------|--------------------|-------------------------------------|----------------------------------|----------------------------------|---------------------------------|
| PTS                  | Glucose            | <i>ptsG</i>                         | IIABC                            | 08465                            |                                 |
|                      | Mannose            | <i>man</i> <b>M</b> <b>N</b>        | IIAB, C, D                       | 07135-45                         | This Study                      |
|                      | Mannose/Fructose   | <i>manXYZ</i> ( <i>ptsBCD</i> )     | IIA, B, C, D                     | 04035-50                         |                                 |
|                      | Fructose           | <i>fruA</i>                         | IIABC                            | 03490                            |                                 |
|                      | Galactose          | <i>gatABC.1</i>                     | IIA, B, C                        | 07005-15                         | Lac1 (1)                        |
|                      | Lactose            | <i>lacEF</i>                        | IIA, BC                          | 08210-15                         | Lac2 (1)                        |
|                      | Sucrose            | <i>scrA</i>                         | IIABC                            | 07410                            |                                 |
|                      | Trehalose          | <i>treP</i>                         | IIABC                            | 08870                            |                                 |
|                      | β-Glucoside        | <i>bglF</i>                         | IIABC                            | 02590                            |                                 |
|                      | Cellobiose         | <i>celABC.2</i>                     | IIA, B, C                        | 08690-700                        |                                 |
|                      | Cellobiose         | <i>celABC.1</i> ( <i>ptcAB</i> )    | IIA, B, C                        | 05360-75                         |                                 |
|                      | Ascorbate          | <i>sgaTBA.1</i> ( <i>ulaABC</i> )   | IIA, B, C                        | 0980-90                          |                                 |
|                      | Ascorbate/Mannitol | <i>sgaTB.2 bglG</i> ( <i>ulaA</i> ) | IIA, B, C                        | 08335-45                         |                                 |
|                      | GalNAc             | <i>agaFVWD</i>                      | IIA, B, C, D                     | 02795-815                        |                                 |
|                      | ABC                | Neu5Ac                              | <i>nanBCD</i> <b>H</b>           | Substrate Binding, Permease 1, 2 | 01215-35                        |
| Guanosine            |                    | <i>nupO</i> <b>P</b> <b>Q</b>       | ATP Binding, Permease 1, 2       | 04645-55                         |                                 |
| Maltose/Maltodextrin |                    | <i>malEFG</i>                       | Substrate Binding, Permease 1, 2 | 05285-95                         | (2, 3)                          |
| Other                | Multiple sugars    | <i>msmK</i>                         | ATP Binding                      | 08425                            |                                 |
|                      | Malate             | <i>malP</i>                         | Malate/Sodium Symporter          | 04180                            |                                 |
|                      | Glycerol           | <i>glpF</i> , <i>glpF.2</i>         | Permease 1, 2                    | 06905, 07885                     |                                 |
|                      | Glycerol-3-P       | <i>glpT</i>                         | Permease                         | 01935                            |                                 |

<sup>a</sup>Gene names derive from a consensus of fully annotated *S. pyogenes* genomes, while alternative names are listed in parentheses. Inverse background and font indicate genes which were mutated in PBr isolates. HSC5, similar to most sequenced strains (15/20 total sequenced strains), lacks the 9kb region encoding MalCD (maltodextrin ABC transporter permease) as this operon appears to be unique to M1 (all four sequenced M1 strains), M2, M4, and M28.

<sup>b</sup>Loci are in format L897\_xxxxx, where xxxxx is numbered.

<sup>c</sup>Sugar transporters are predicted based on gene annotations, or established by experimental analysis as detailed in cited literature.

## REFERENCES

- Loughman JA, Caparon MG (2007) Comparative functional analysis of the lac operons in *Streptococcus pyogenes*. Mol Microbiol 64: 269-280.
- Shelburne SA 3rd, Fang H, Okorafor N, Sumbly P, Sitkiewicz I, Keith D, Patel P, Austin C, Graviss EA, Musser JM, Chow DC (2007) MalE of group A Streptococcus participates in the rapid transport of maltotriose and longer maltodextrins. J Bacteriol 189: 2610-7.
- Shelburne SA 3rd, Sumbly P, Sitkiewicz I, Okorafor N, Granville C, Patel P, Voyich J, Hull R, DeLeo FR, Musser JM (2006) Maltodextrin utilization plays a key role in the ability of group A Streptococcus to colonize the oropharynx. Infect Immun 74: 4605-14.
